# Supplementary material for: Improved lipophilic probe for visualizing lipid droplets in erastin-induced ferroptosis
Source: Royal Society of Chemistry journal article supplement (doi:10.1039/d3ob01545a), 2023-01-01
Supplement: d3ob01545a1.pdf [file d3ob01545a1.pdf]

## Improved Lipophilic Probe for Visualizing Lipid droplets in Erastin-Induced Ferroptosis

Deeksha Rajput<sup>a</sup>, Paramasivam Mahalingavelar<sup>b</sup>, Virupakshi Soppina<sup>\*c</sup> and Sriram Kanvah<sup>a\*</sup>

<sup>a</sup>Department of Chemistry, Indian Institute of Technology Gandhinagar, Palaj, Gandhinagar, Gujarat – 382055: email: [sriram@iitgn.ac.in](mailto:sriram@iitgn.ac.in)

<sup>b</sup>School of Chemistry and Biochemistry, Georgia Institute of Technology Atlanta Georgia 30332

<sup>c</sup>Department of Biological Engineering, Indian Institute of Technology Gandhinagar, Palaj, Gandhinagar, Gujarat -382055 Email: [vsoppina@iitgn.ac.in](mailto:vsoppina@iitgn.ac.in)

| Contents in the supporting information |                                                                                     |
|----------------------------------------|-------------------------------------------------------------------------------------|
| S1.                                    | A few reported fluorophores for the visualization of the ferroptosis process in LDs |
| S2.                                    | Absorption and emission spectral data                                               |
| S3.                                    | Lifetime spectral decay – Table S3 and Fig S3                                       |
| S4.                                    | Optimized geometries                                                                |
| S5.                                    | Energy level diagram                                                                |
| S6.                                    | Geometrical parameters                                                              |
| S7.                                    | TDDFT simulated absorption spectral data- Fig S7 and Table S7                       |
| S8.                                    | The computed total density of states predicted at the ground state.                 |
| S9.                                    | Illustration of the effect of <i>ortho</i> -substitution                            |
| S10.                                   | Molecular orbital density coefficients                                              |
| S11.                                   | Computed total density of states                                                    |
| S12.                                   | Cytotoxicity assay                                                                  |
| S13.                                   | Photostability and phototoxicity investigations                                     |
| S14.                                   | Characterization data for the synthesized compounds                                 |
| S15.                                   | Spectral details: <sup>1</sup> H NMR, <sup>13</sup> C NMR and HRMS Spectra          |

## S1: Reported Probes for Ferroptosis in LDs

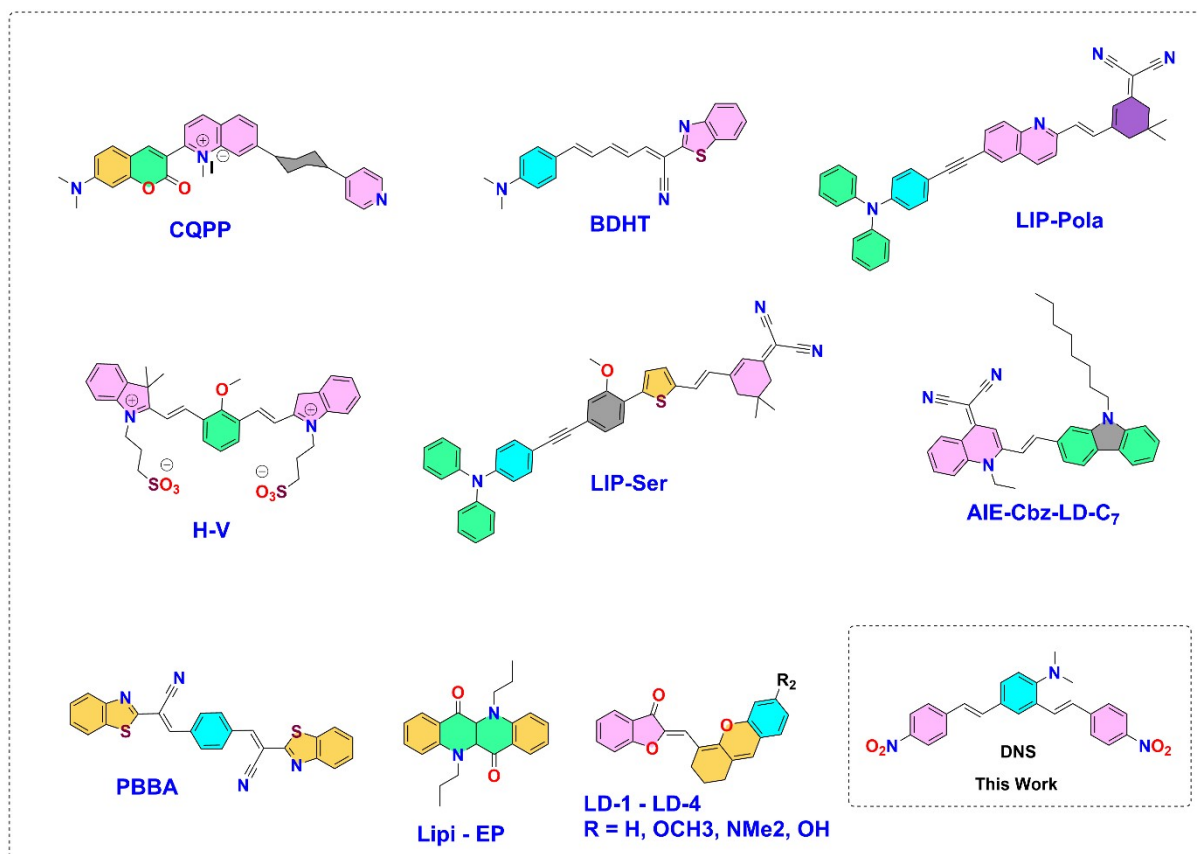

## S2: Absorption and emission spectra

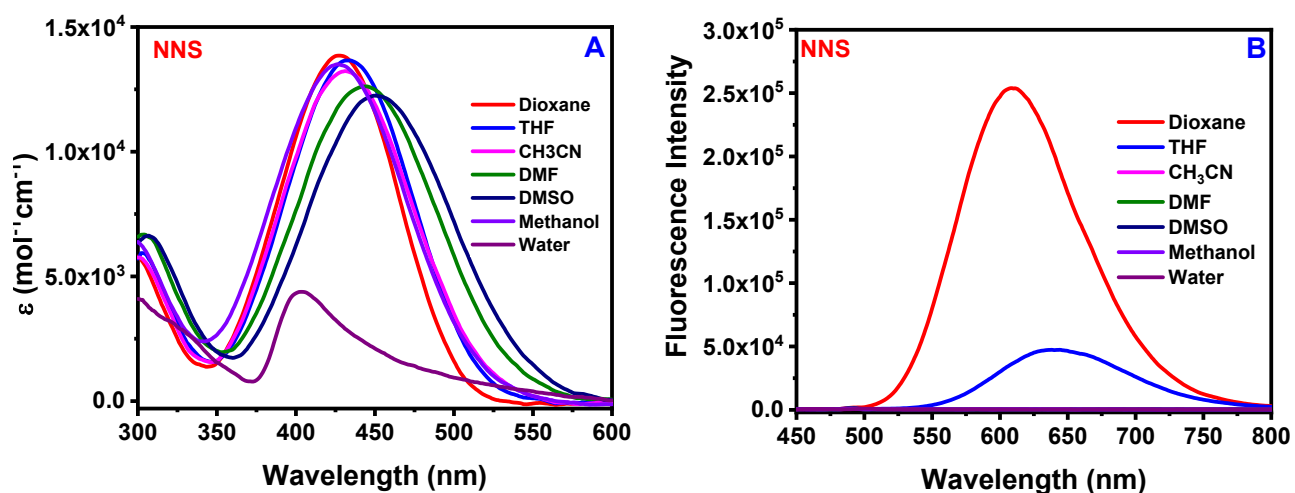

Fig S2: A) Absorption & B) Emission data of NNS in different solvents.

### S3: Lifetime data:

Table S3: Lifetime decay of NNS and DNS in different solvents

| NNS        |                                                                    |       |               |       |                                  |          |
|------------|--------------------------------------------------------------------|-------|---------------|-------|----------------------------------|----------|
| Components | $\tau_1$ (ns)                                                      | A1    | $\tau_2$ (ns) | A2    | Average Lifetime ( $\tau$ ) (ns) | $\chi^2$ |
| Dioxane    | 0.2                                                                | 7.5%  | 1.3           | 92.4% | 1.0                              | 1.53     |
| THF        | 0.5                                                                | 100%  | -             | -     | 0.5                              | 1.34     |
| DMSO       | 1.1                                                                | 17.8% | 0.03          | 82.1% | 0.03                             | 1.21     |
| Water      | 0.03                                                               | 41.7% | 0.24          | 51.2% | 0.06                             | 1.47     |
| DNS        |                                                                    |       |               |       |                                  |          |
| Components | $\tau_1$ (ns)                                                      | A1    | $\tau_2$ (ns) | A2    | Average Lifetime ( $\tau$ ) (ns) | $\chi^2$ |
| Dioxane    | 0.2                                                                | 63.4% | 0.5           | 36.5% | 0.2                              | 1.06     |
| THF        | 0.06                                                               | 71.7% | 0.55          | 21.2% | 0.08                             | 1.25     |
| DMSO       | 0.02                                                               | 78.1% | 0.48          | 21.8% | 0.02                             | 1.37     |
| Water      | --- Lifetime value too little (beyond instrument limit to measure) |       |               |       |                                  |          |

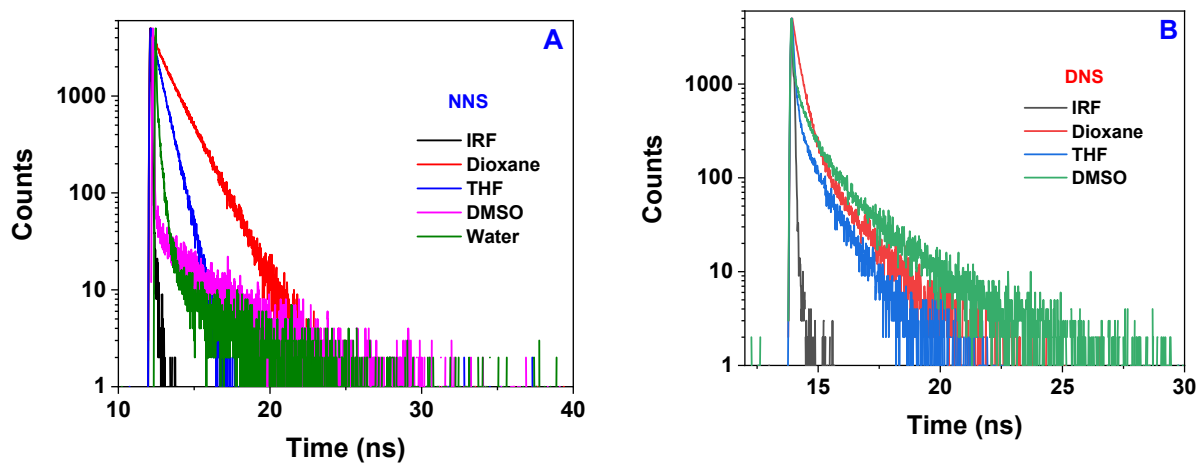

Fig S3: Fluorescence lifetime plot of A) NNS and B) DNS in different solvent environments.

#### S4: Optimized geometries

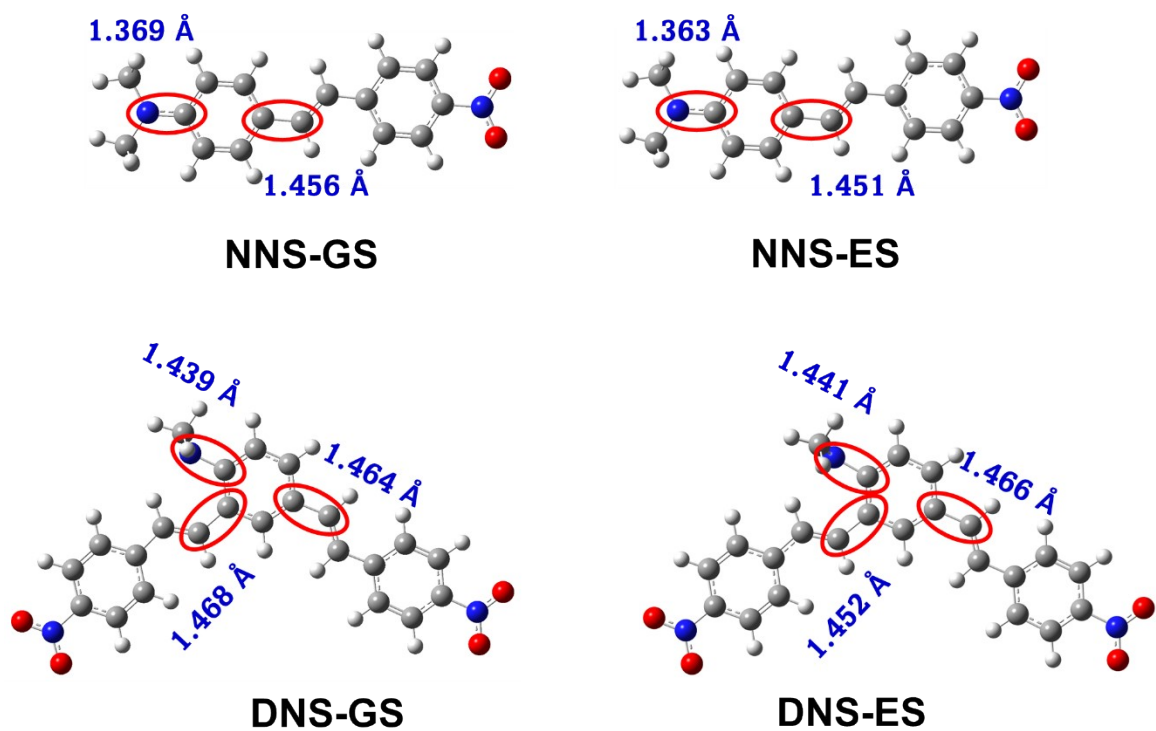

Fig S4: Optimized geometries of the monomer and dimer derivatives at the ground and excited states obtained from the B3LYP/6-311G (d, p) level of theory with selected bond distances.

## S5: Energy level diagram

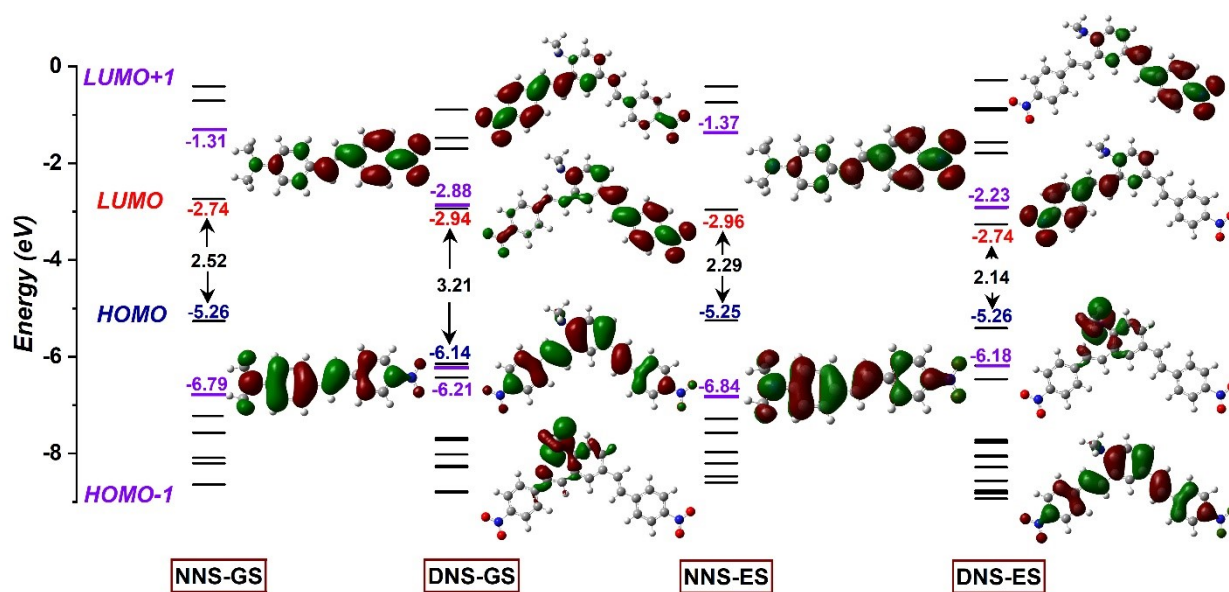

Fig S5: Schematic energy level diagram illustrating the energy levels, HOMO-LUMO gap, and isodensity surface plots of the frontier molecular orbitals for NNS and DNS molecules obtained at the ground and excited states. The green and red surfaces represent positive and negative signs of the MO at isovalue of 0.02 a.u., respectively.

## S6: Geometrical parameters

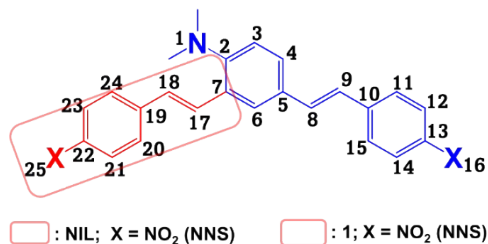

|         | NNS-GS | NNS-ES | DNS-GS | DNS-ES |
|---------|--------|--------|--------|--------|
| N1-C2   | 1.370  | 1.363  | 1.439  | 1.441  |
| C2-C3   | 1.392  | 1.423  | 1.396  | 1.391  |
| C3-C4   | 1.383  | 1.377  | 1.389  | 1.387  |
| C4-C5   | 1.408  | 1.415  | 1.404  | 1.407  |
| C5-C6   | 1.411  | 1.417  | 1.401  | 1.398  |
| C6-C7   | 1.381  | 1.376  | 1.405  | 1.411  |
| C7-C2   | 1.421  | 1.425  | 1.421  | 1.420  |
| C5-C8   | 1.451  | 1.456  | 1.464  | 1.466  |
| C8-C9   | 1.354  | 1.355  | 1.347  | 1.346  |
| C9-C10  | 1.455  | 1.465  | 1.462  | 1.462  |
| C10-C11 | 1.414  | 1.411  | 1.411  | 1.410  |
| C11-C12 | 1.382  | 1.385  | 1.383  | 1.384  |
| C12-C13 | 1.397  | 1.404  | 1.395  | 1.395  |
| C13-C14 | 1.394  | 1.402  | 1.392  | 1.392  |
| C14-C15 | 1.384  | 1.388  | 1.386  | 1.386  |
| C15-C10 | 1.413  | 1.408  | 1.409  | 1.408  |
| C13-X16 | 1.457  | 1.432  | 1.465  | 1.466  |
| C7-C17  |        |        | 1.468  | 1.453  |
| C17-C18 |        |        | 1.349  | 1.365  |
| C18-C19 |        |        | 1.463  | 1.440  |
| C19-C20 |        |        | 1.411  | 1.422  |
| C20-C21 |        |        | 1.384  | 1.376  |
| C21-C22 |        |        | 1.395  | 1.413  |
| C22-C23 |        |        | 1.392  | 1.411  |
| C23-C24 |        |        | 1.386  | 1.378  |
| C24-C19 |        |        | 1.409  | 1.419  |

|         |  |  |       |       |
|---------|--|--|-------|-------|
| C22-X25 |  |  | 1.465 | 1.407 |
|---------|--|--|-------|-------|

Fig S6: Geometrical parameters of the NNS and DNS molecules optimized at the ground and excited states.

### S7: TDDFT simulated absorption spectral data

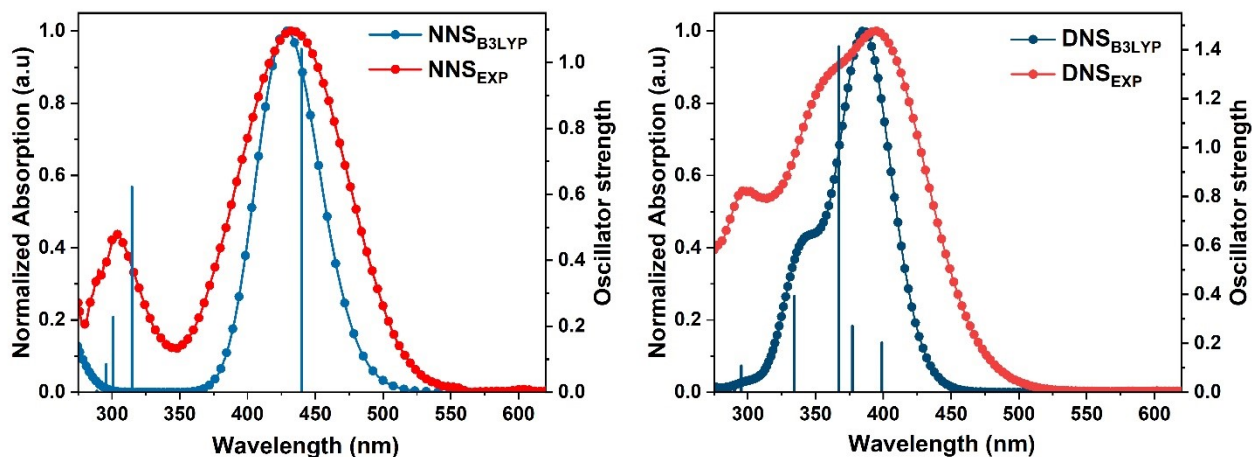

Fig S7: TDDFT simulated absorption spectral data and oscillator strength obtained from B3LYP/6-311G (d, p)/C-PCM (THF) level of theory and compared with the experimental absorption recorded in THF.

Table S7. Comparison of absorption properties of the molecules with computed excitation energy, oscillator strength, major transitions involved in frontier molecular Orbitals, and dipole moments.

|            | $\lambda_{\text{exp}}^{\text{a}}$<br>(nm) | $\lambda_{\text{B3LYP}}^{\text{b}}$<br>(nm) | $f_{\text{B3LYP}}^{\text{b}}$ | Major transitions                                                 | $\mu_{\text{g}}^{\text{c}}$<br>(Debye) | $\mu_{\text{e}}^{\text{d}}$<br>(Debye) |
|------------|-------------------------------------------|---------------------------------------------|-------------------------------|-------------------------------------------------------------------|----------------------------------------|----------------------------------------|
| <b>NNS</b> | 434                                       | 428.4                                       | 1.61                          | HOMO->LUMO (91%), H-1-> LUMO, (3%), HOMO->L+1 (4%)                | 13.9                                   | 12.6                                   |
| <b>DNS</b> | 394                                       | 385.7                                       | 2.13                          | H-1->LUMO (30%), HOMO->L+1 (56%), HOMO->LUMO (6%), HOMO->L+3 (3%) | 9.4                                    | 9.1                                    |

Absorption spectra measured in THF in the concentration of  $1 \times 10^{-5}$  M at ambient temperature; simulated absorption maximum and oscillator strength obtained at the TDDFT/ B3LYP/6-311G\*\*/C-PCM(THF) level of theory functional;  $^{\text{c}}\mu_{\text{g}}$ : ground state dipole moment;  $^{\text{d}}\mu_{\text{e}}$ : transient dipole moment.

**S8: Computed total density of states predicted at the ground state.**

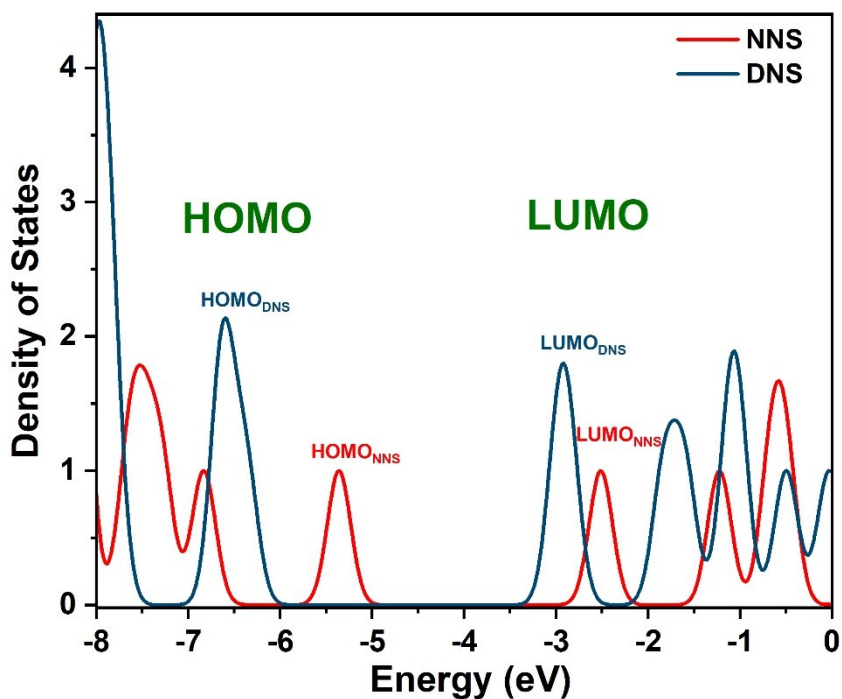

Fig S8: Computed total density of states (TDOS) of the NNS and DNS molecules predicted at the ground state.

**S9: Illustration of the effect of *ortho*-substitution**

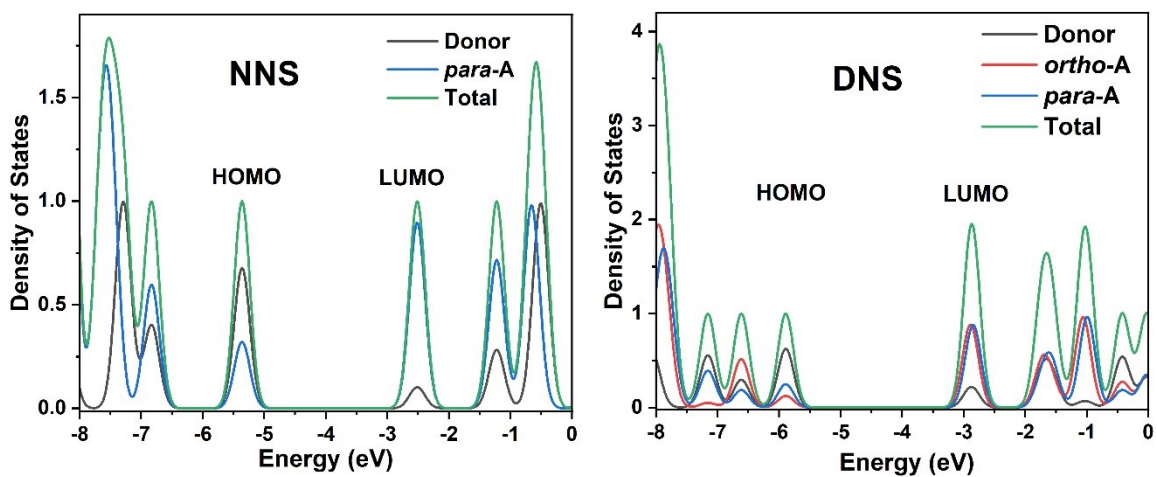



Fig S9: Computed total density of states (TDOS) and projected DOS of the NNS and DNS molecules predicted at the ground state to illustrate the effect of *ortho*-substitution.

### S10: Molecular orbital density coefficients

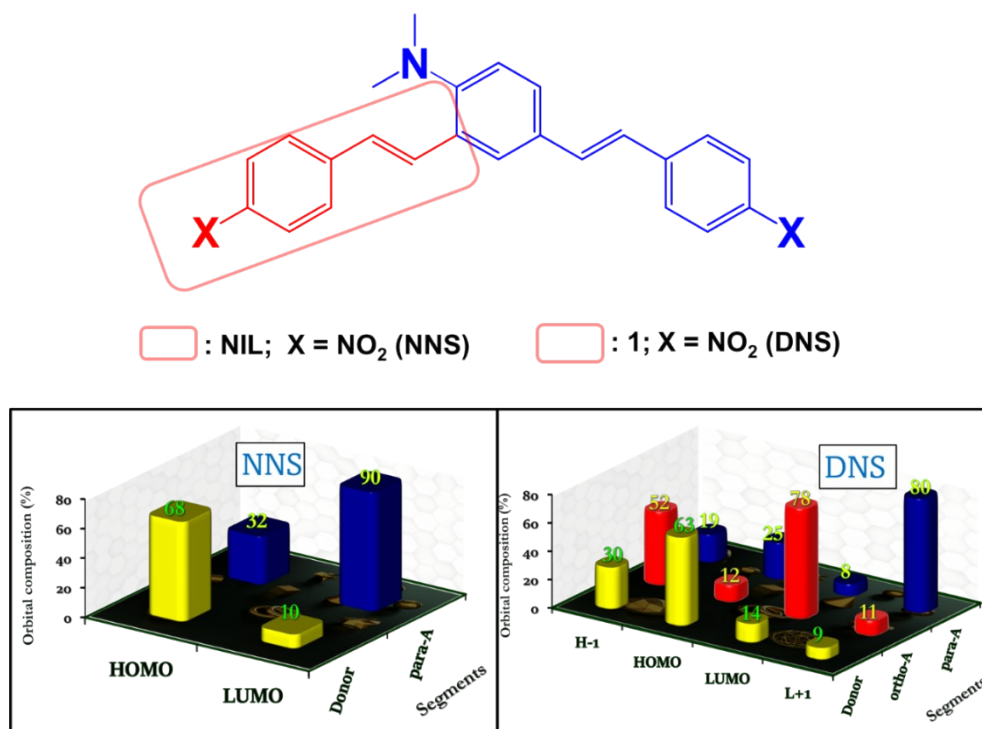

Fig S10: Percentage contribution of the molecular orbital density coefficients of the molecules extracted from the corresponding partitioned segments (D, and *para*-A) for NNS and (D, *ortho*-A, and *para*-A) obtained corresponding to the H-1, HOMO, LUMO, and LUMO+1 energy levels for DNS molecule.

### S11: Computed total density of states (TDOS)

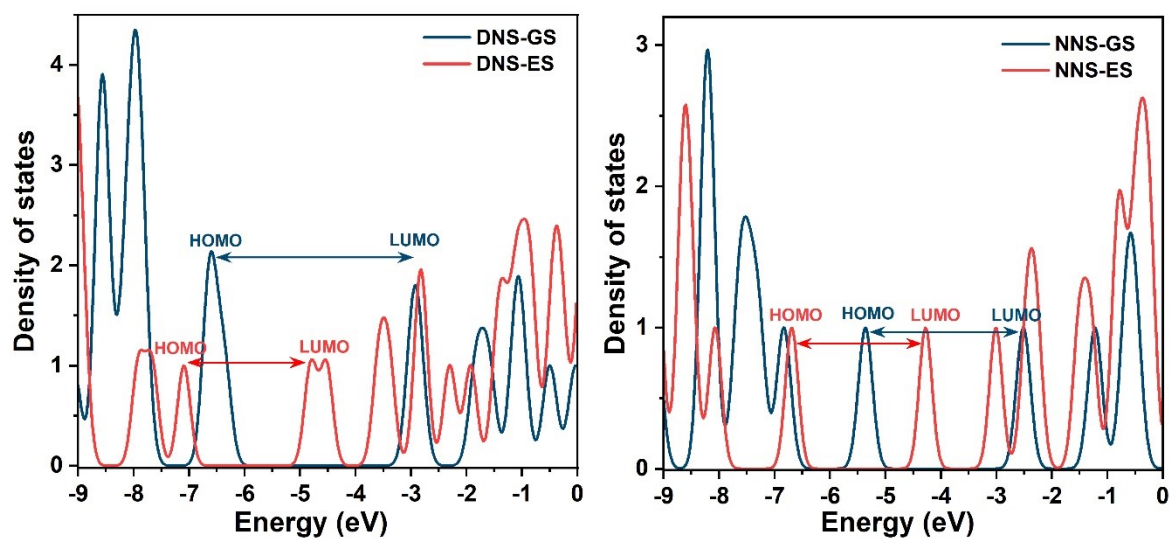

Fig S11: Computed total density of states (TDOS) of the NNS and DNS molecules predicted at the ground and excited states and their respective transformations.

### S12: Cytotoxicity assay (MTT Assay)

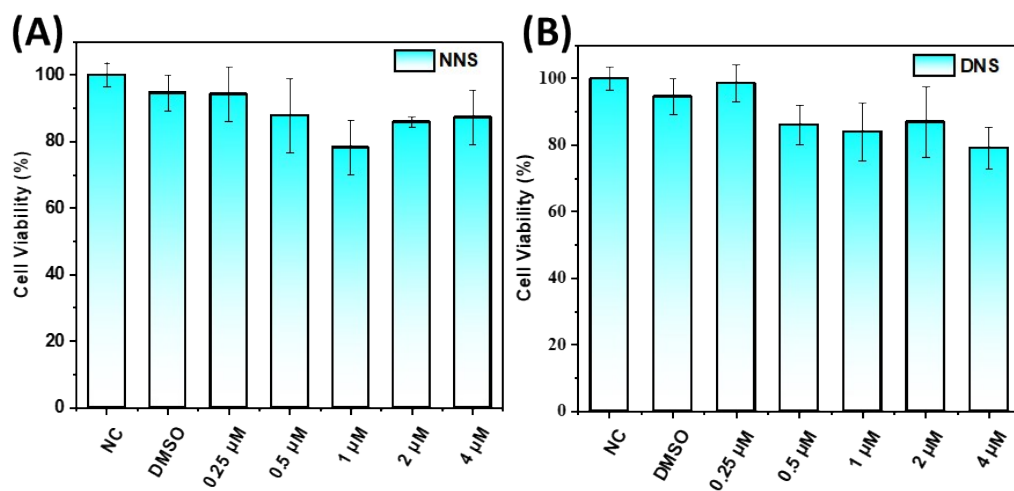

Fig S12: Cytotoxicity assay for NNS (A) and DNS (B) at various concentrations.

**S13: Photostability and phototoxicity of the probes:**

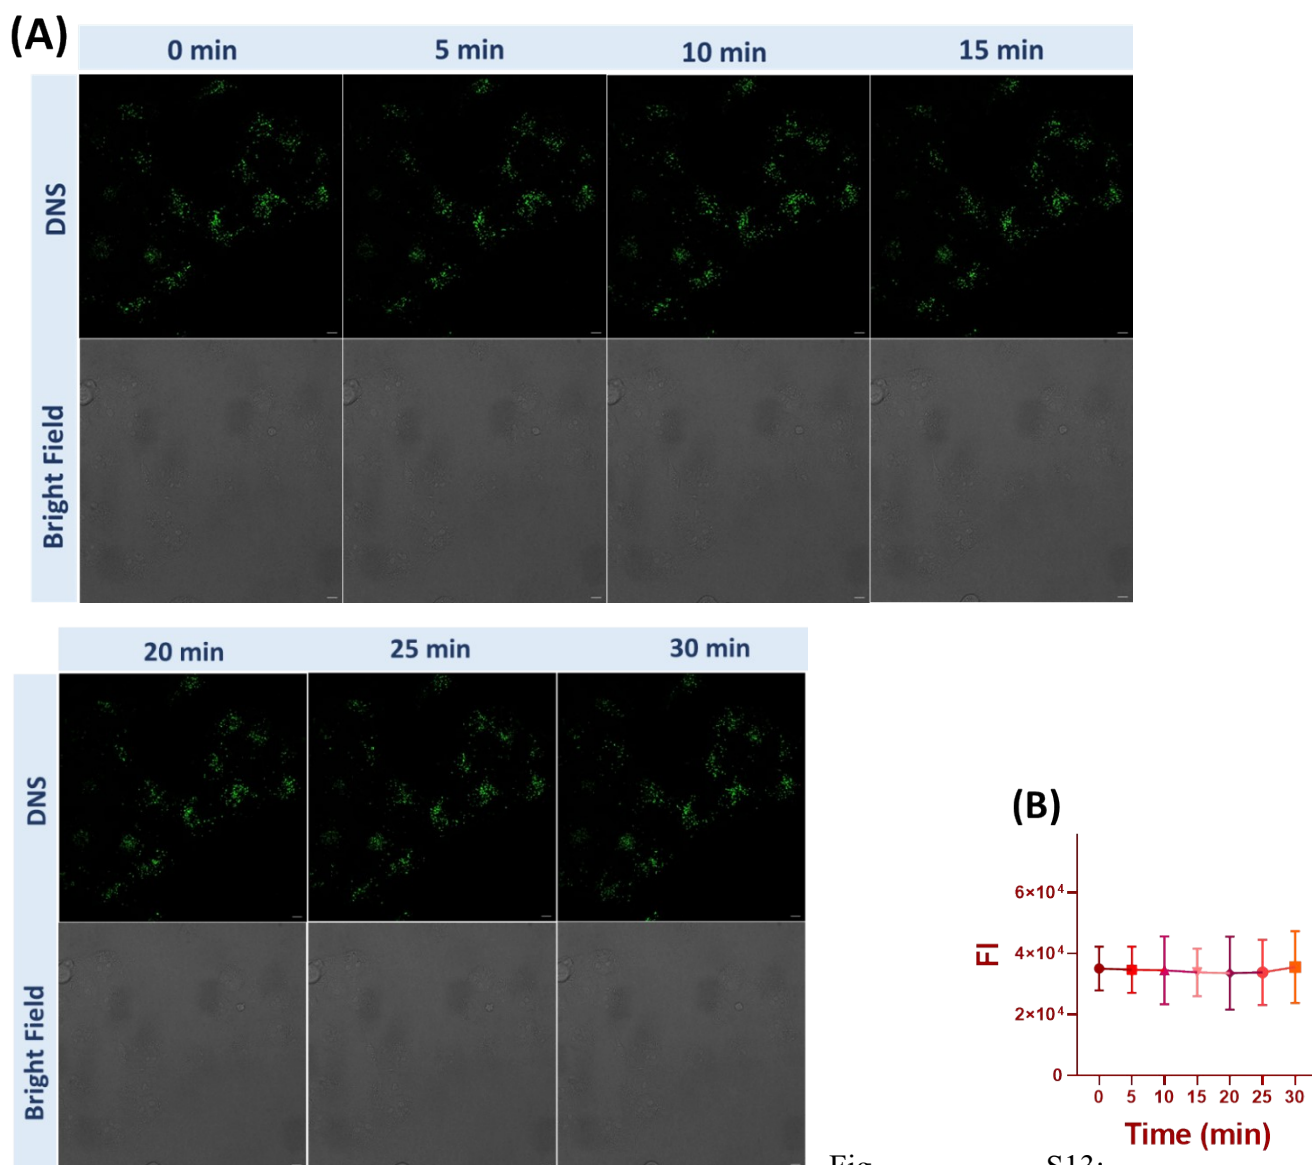

Photostability and Phototoxicity Experiment: A) CLSM images of DNS upon continuous exposure to 405 nm laser for 30-minute duration. B) Fluorescence intensity vs time plot at different time intervals. (Scale Bar 10  $\mu$ m)

## **S14: Synthetic Procedures:**

### **1. Synthesis of 4-(dimethylamino)isophthalaldehyde:**

**4-(dimethylamino)isophthalaldehyde** was synthesized using known procedure in the literature<sup>1</sup>

### **2. Synthesis of NNS ((E)-N, N-dimethyl-4-(4-nitrostyryl)aniline):**

Nitrophenylacetic acid (1.2 equivalent) and piperidine (0.1 equivalent) were mixed together and stirred, followed by the addition of 4 dimethylamino benzaldehyde (1 equivalent). The reaction mixture was heated at 140 °C for 2h to get red-colored precipitate. The precipitate was further filtered and washed with hexane and diethyl ether. Yield: 62%; <sup>1</sup>H NMR (500 MHz, DMSO) δ 8.19 (d, *J* = 8.8 Hz, 2H), 7.77 (d, *J* = 8.9 Hz, 2H), 7.52 (d, *J* = 8.8 Hz, 2H), 7.44 (d, *J* = 16.3 Hz, 1H), 7.13 (d, *J* = 16.4 Hz, 1H), 6.75 (d, *J* = 8.8 Hz, 2H), 2.97 (s, 6H). HRMS: Observed Mass: 269.1293; Calculated Mass: 269.1290

### **3. Synthesis of DNS (N, N-dimethyl-3,4-bis((E)-4-nitrostyryl)aniline):**

Nitrophenylacetic acid (1.2 equivalent) and piperidine (0.1 equivalent) were mixed together and stirred followed by the addition of 4 dimethylamino isothalaldehyde (1 equivalent).. The reaction mixture was heated at 140 °C for 2h to get red colored ether to yield red color solid. Yield: 51%; <sup>1</sup>H NMR (500 MHz, DMSO) δ 8.25 (dd, *J* = 8.7, 8.0 Hz, 4H), 8.01 (d, *J* = 1.9 Hz, 1H), 7.87 (dd, *J* = 23.3, 8.9 Hz, 4H), 7.60 (d, *J* = 16.5 Hz, 2H), 7.52 (s, 1H), 7.45 – 7.37 (m, 2H), 7.13 (d, *J* = 8.4 Hz, 1H), 2.78 (s, 6H). <sup>13</sup>C NMR (126 MHz, DMSO) δ 153.34, 146.62, 146.31, 144.94, 133.49, 131.16, 130.41, 129.70, 128.90, 127.69, 127.38, 126.61, 126.50, 125.06, 124.64, 124.58, 118.91, 44.72, 40.50, 40.42, 40.33, 40.25, 40.16, 39.99, 39.83, 39.66, 39.49. HRMS: Observed Mass: 416.1356; Calculated Mass: 416.1610

### S15: Spectral Details – <sup>1</sup>H NMR and <sup>13</sup>C NMR Spectral copies

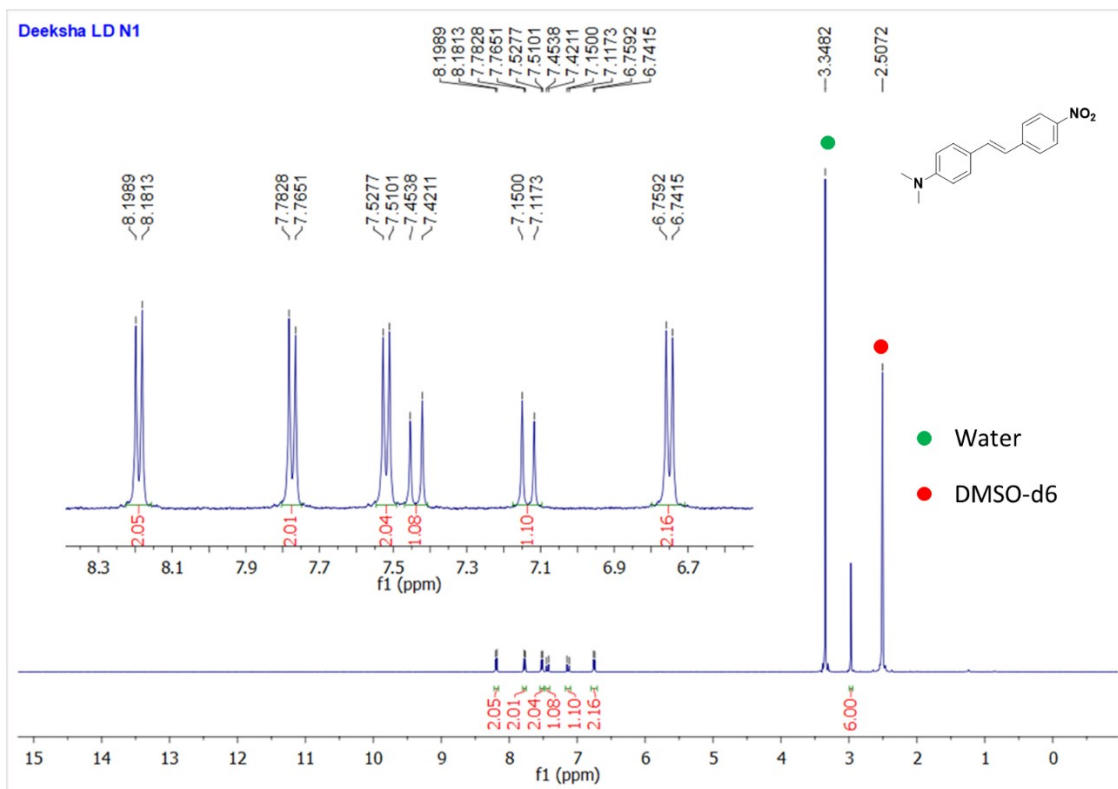

Fig S15a: <sup>1</sup>H NMR of NNS

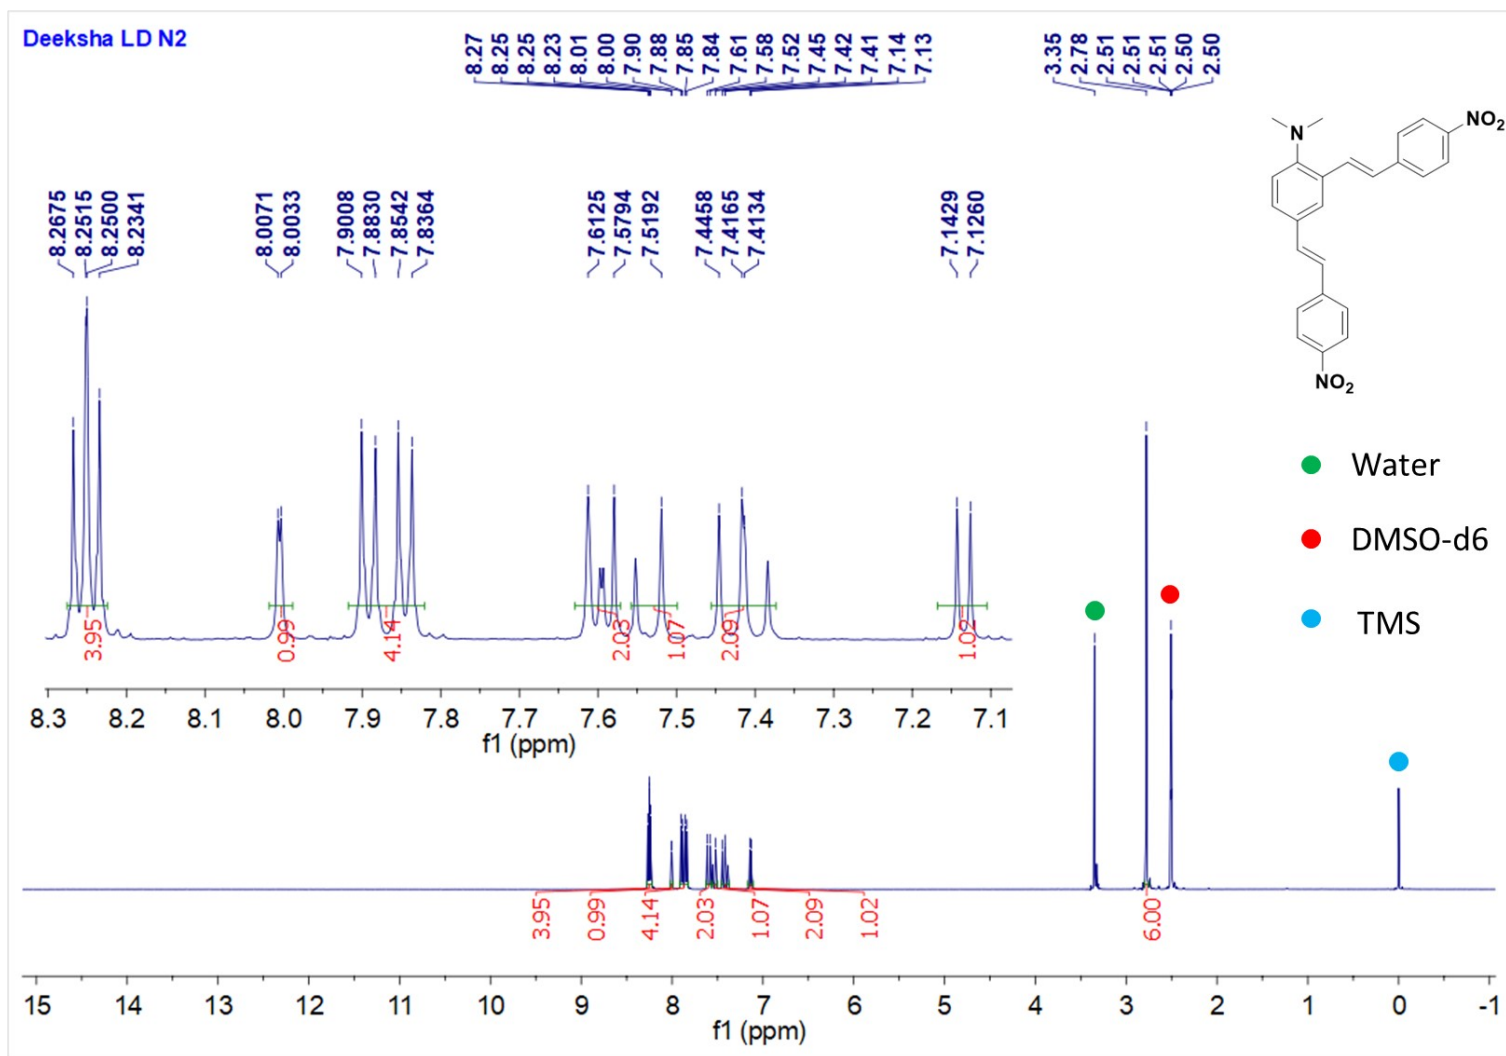

Fig S15b: <sup>1</sup>H NMR of DNS

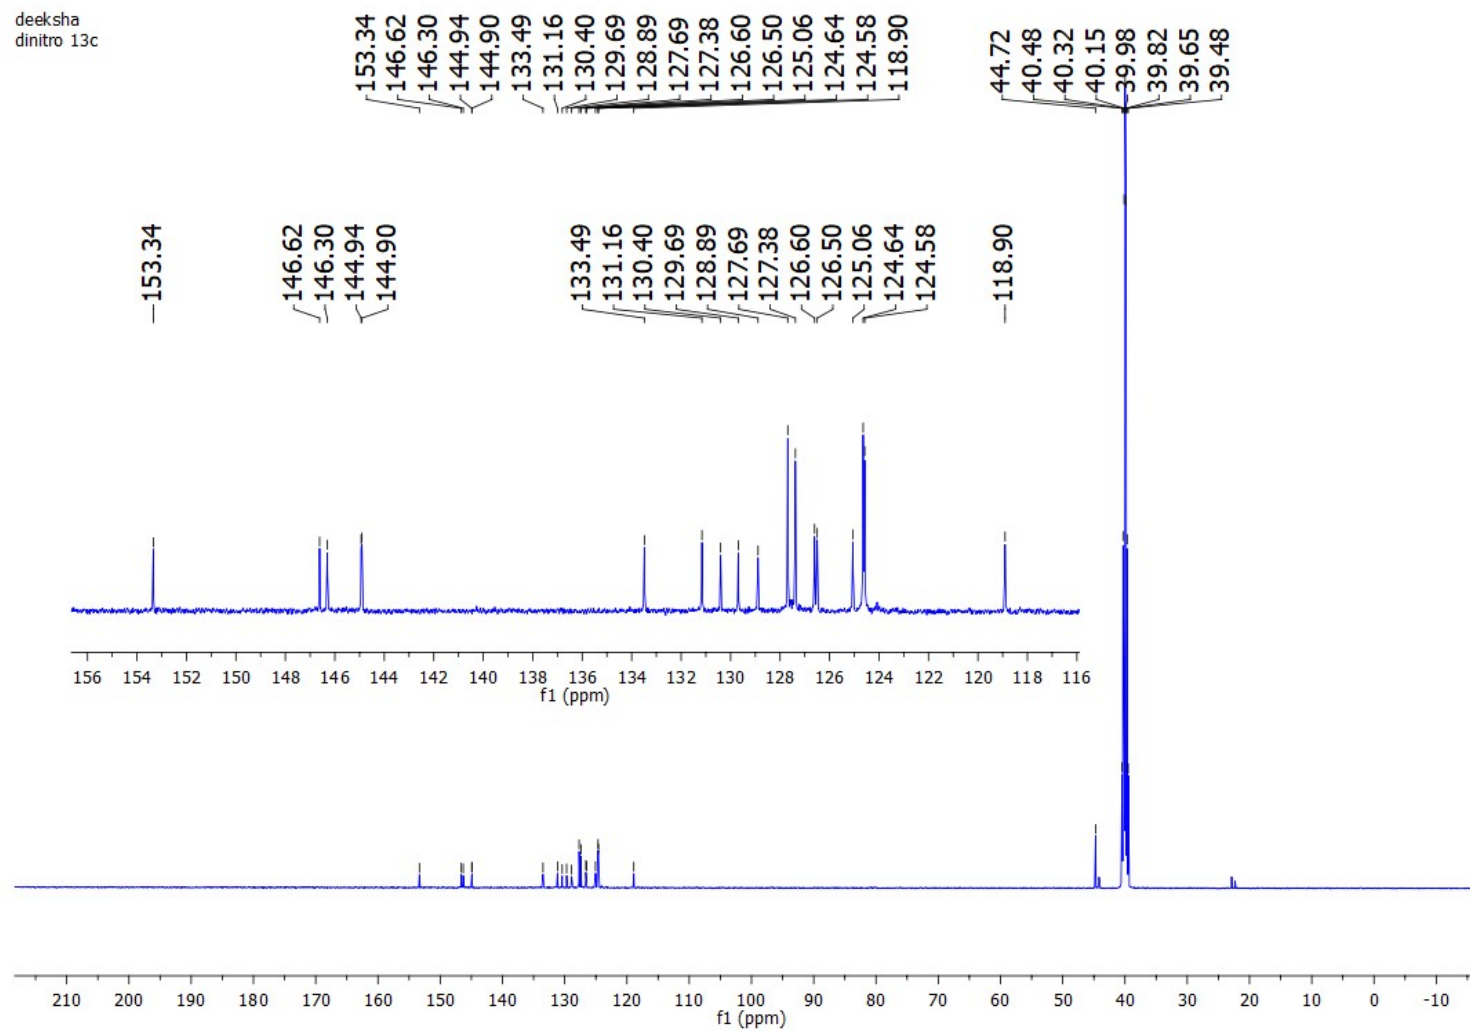

Fig S15c:  $^{13}\text{C}$  NMR of DNS

SKG DR W1  
IITGN\_Pos\_29\_May\_23\_69 279 (6.573)

IIT, GN

03-Jun-2023 10:24:34  
1: TOF MS ES+  
7.07e5

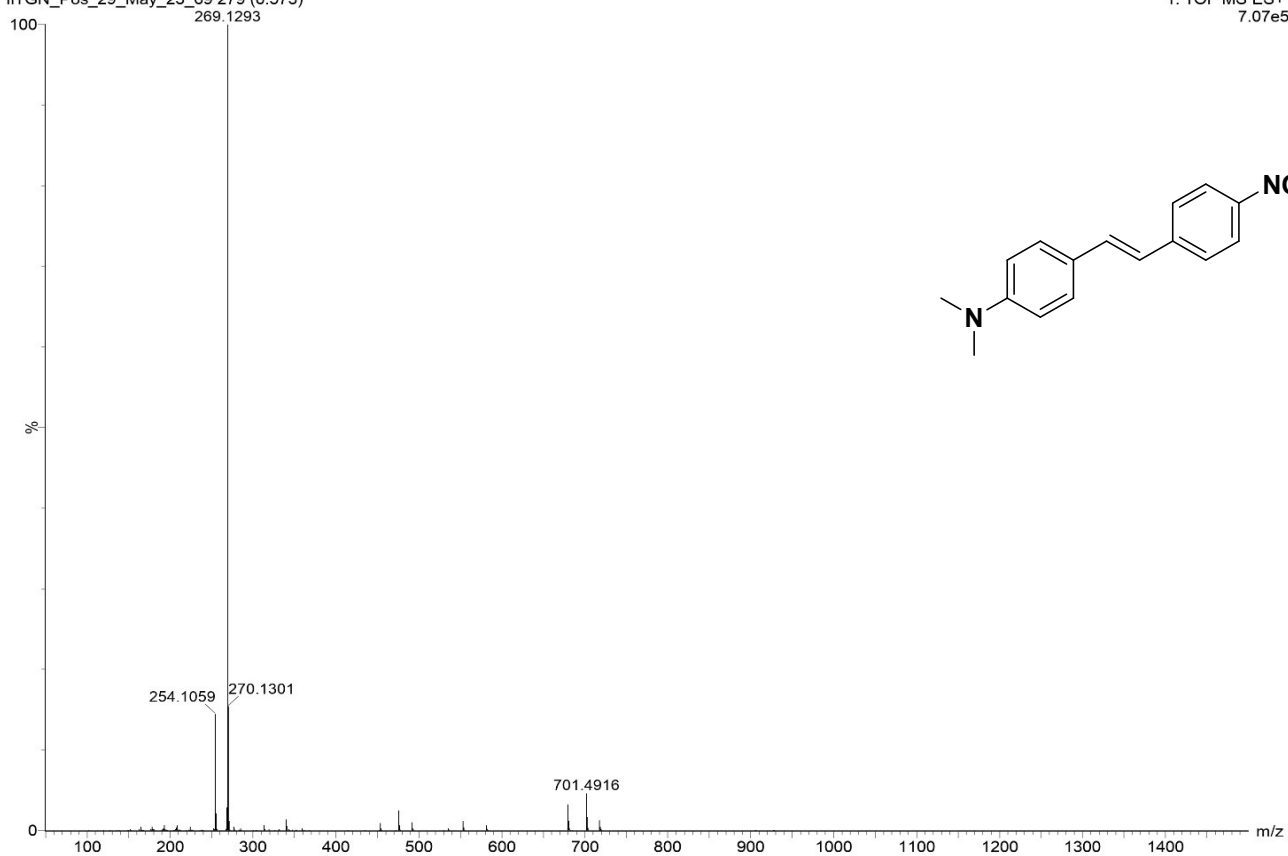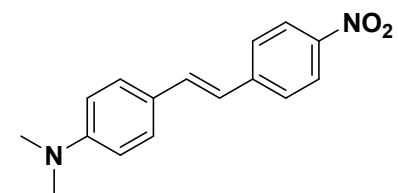

Fig S15d: HRMS of NNS



F

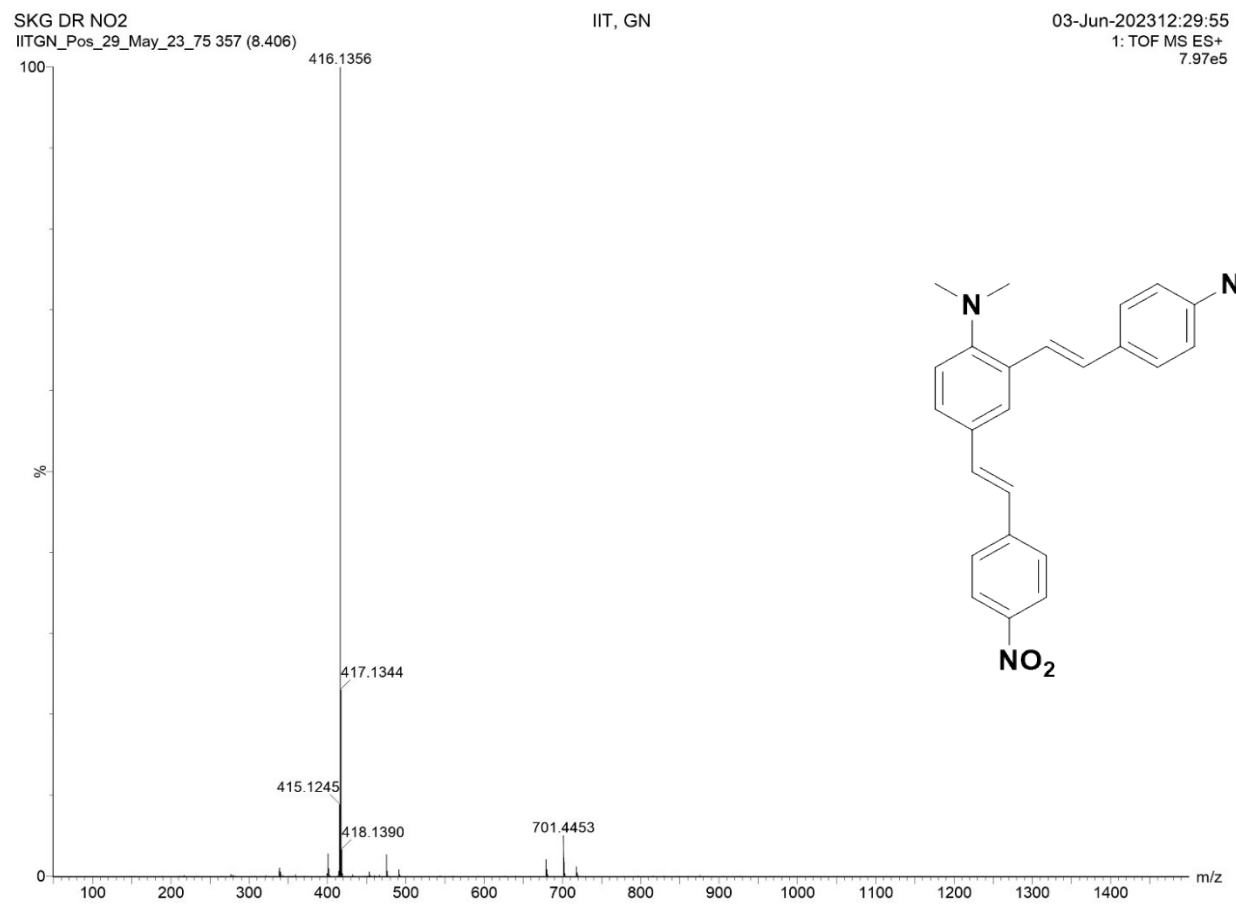

Fig  
S15e: HRMS of DNS

1. W. Fang, W. Zhao, P. Pei, R. Liu, Y. Zhang, L. Kong and J. Yang, *Journal of Materials Chemistry C*, 2018, **6**, 9269-9276.
